# Supplementary material for: Anti-Ischemic Effects of PIK3IP1 Are Mediated through Its Interactions with the ETA-PI3Kγ-AKT Axis
Source: MDPI journal article supplement (doi:10.3390/cells11142162), 2022-07-11

Supplementary Table S1. List of antibodies for the present study.

| Antibody                                    | Purchase from             | Cat#      |
|---------------------------------------------|---------------------------|-----------|
| Anti- HIF-1 $\alpha$                        | Cell signaling Technology | #14179    |
| Anti- ET-1                                  | abcam                     | ab2786    |
| Anti- p-Akt (Ser473)                        | Cell signaling Technology | #4060     |
| Anti- AKT                                   | Cell signaling Technology | #9272     |
| Anti- PIK3IP1                               | Santa Cruz                | sc-365777 |
| Anti- p53                                   | Cell signaling Technology | #2527     |
| Anti- BAX                                   | Cell signaling Technology | #2774     |
| Anti- Bcl-2                                 | Cell signaling Technology | #3498     |
| Anti- LC3B                                  | Cell signaling Technology | #2775     |
| Anti- c-Caspase-3 (Asp175)                  | Cell signaling Technology | #9661     |
| Anti- PI3K $\alpha$                         | Santa Cruz                | sc-293172 |
| Anti- PI3K $\gamma$                         | Santa Cruz                | sc-166365 |
| Anti- ETAR                                  | abcam                     | ab178454  |
| Anti- ETBR                                  | abcam                     | ab117529  |
| Anti- eNOS                                  | Cell signaling Technology | #9572     |
| Anti- PKG1                                  | Cell signaling Technology | #3248     |
| Anti- p-VASP (Ser239)                       | Cell signaling Technology | #3114     |
| Anti- p-p44/42 MAPK (ERK1/2)(Thr202/Tyr204) | Cell signaling Technology | #9101     |
| Anti- p44/42 MAPK (Erk1/2)                  | Cell signaling Technology | #9102     |
| Anti- p-p70 S6 Kinase (Thr389)              | Cell signaling Technology | #9205     |
| Anti- p70 S6 Kinase                         | Cell signaling Technology | #9202     |
| Anti- p-SAPK/JNK (Thr183/Tyr185)            | Cell signaling Technology | #9251     |
| Anti- SAPK/JNK                              | Cell signaling Technology | #9252     |
| Anti- p-p38 MAPK (Thr180/Tyr182)            | Cell signaling Technology | #9211     |
| Anti- p38 MAPK                              | Cell signaling Technology | #9212     |

Supplementary Table S2. List of primer sets for the present study.

| Gene    | Forward primer (5'-3')     | Reverse primer (5'-3')     |
|---------|----------------------------|----------------------------|
| 18S     | TTCTGGCCAACGGTCTAGACAAC    | CCAGTGGTCTTGGTGTGCTGA      |
| PIK3IP1 | TTAGGATCCCATTTGGACACTGGCTG | GATCCTAGGCCTGTACCAGTGTTTAC |
| SOD1    | GCAGAAGGCAAGCGGTGAAC       | TAGCAGGACAGCAGATGAGT       |
| SOD2    | CTGAGGAGAGCAGCGGTCGT       | CTTGCCAGCGCCTCGTGGT        |
| GPX1    | CGATGCCACTGCCCTCAT         | GGCCACCAGGAACTTCTC         |
| GPX4    | GGCTACAATGTCAGGTT          | TTATCAATGAGAACTTGGTAA      |

Supplementary Figure S1

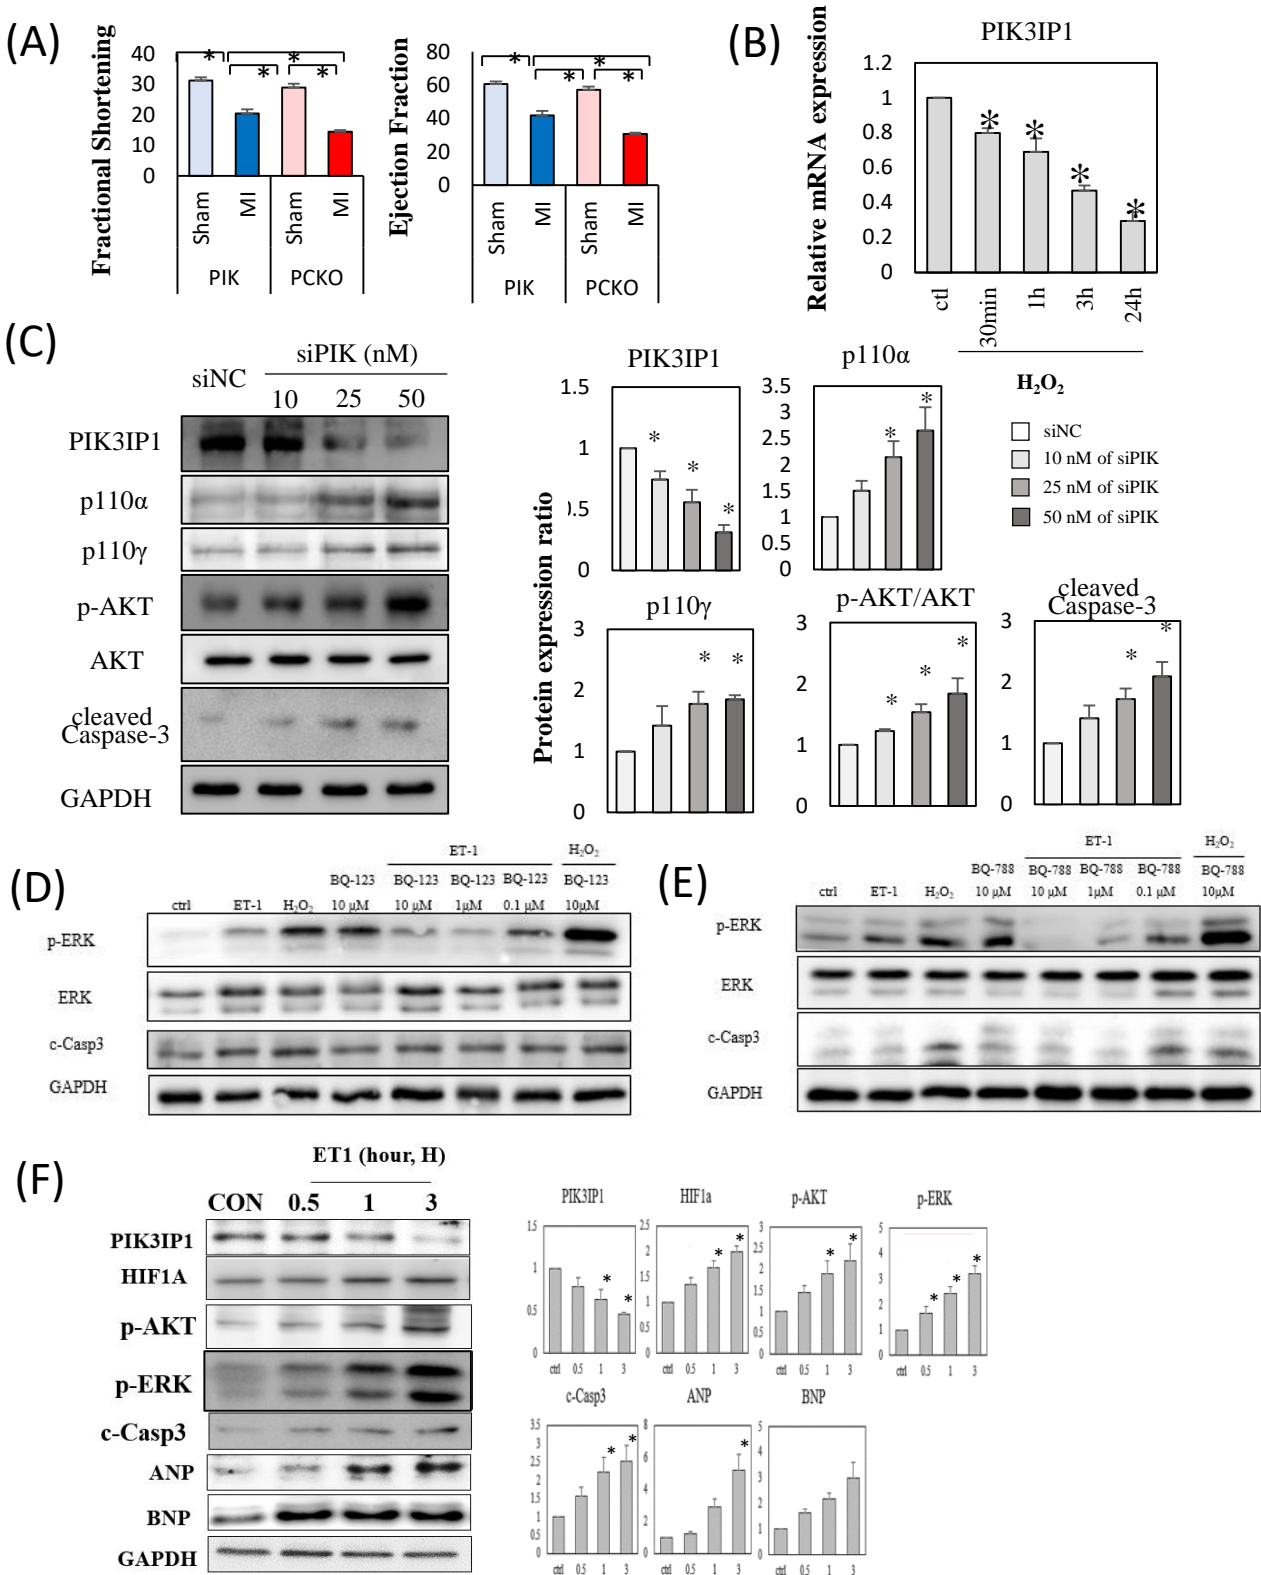

**Supplementary Figure S1. Echocardiography of PCKO mice underwent MI, and chemical time/dose conditions were tested.**

(A) 8-week-old PIK3IP1<sup>fl/fl</sup>(PIK-control) and aMHC-Cre-PIK3IP1<sup>fl/fl</sup>(PCKO-knockout) mice underwent coronary artery ligation surgery. Fractional shortening and ejection fraction were measured by echocardiography at 6 weeks after myocardial infarction surgery. Note that knockout of PIK3IP1 worsened MI-induced cardiac injury. (B) Relative mRNA expression of PIK3IP1 was measured by qRT-PCR with the PIK3IP1 primers (forward primer, 5'-TTAGGATCC CATTGGACACTGGCTG-3'; reverse primer, 5'-GATCCTAGGCCTGTACCAGTGTTC-3'). The expression of mRNAs was normalized to 18S rRNA. All reactions were performed in triplicate. (C) H9c2 cells were transfected with siPIK (si-PIK3IP1) or 25 nM of siNC (negative control) for 24 h (10, 25, 50 nM each). (D,E) H9c2 cells were treated with/without ET-1 (10 nM) & H<sub>2</sub>O<sub>2</sub> (200 μM) for 3h after pretreatment with BQ-123 or BQ-788 (0.1-10 μM). (F) H9c2 cells were transfected with 10 nM ET-1 for indicated times. The protein levels were measured by western blotting. The results were displayed in bar charts with means ± SEM; N=6; Statistical significance is shown as \*P < 0.05 relative to control (ctl) or siNC group.

Supplementary Figure S2

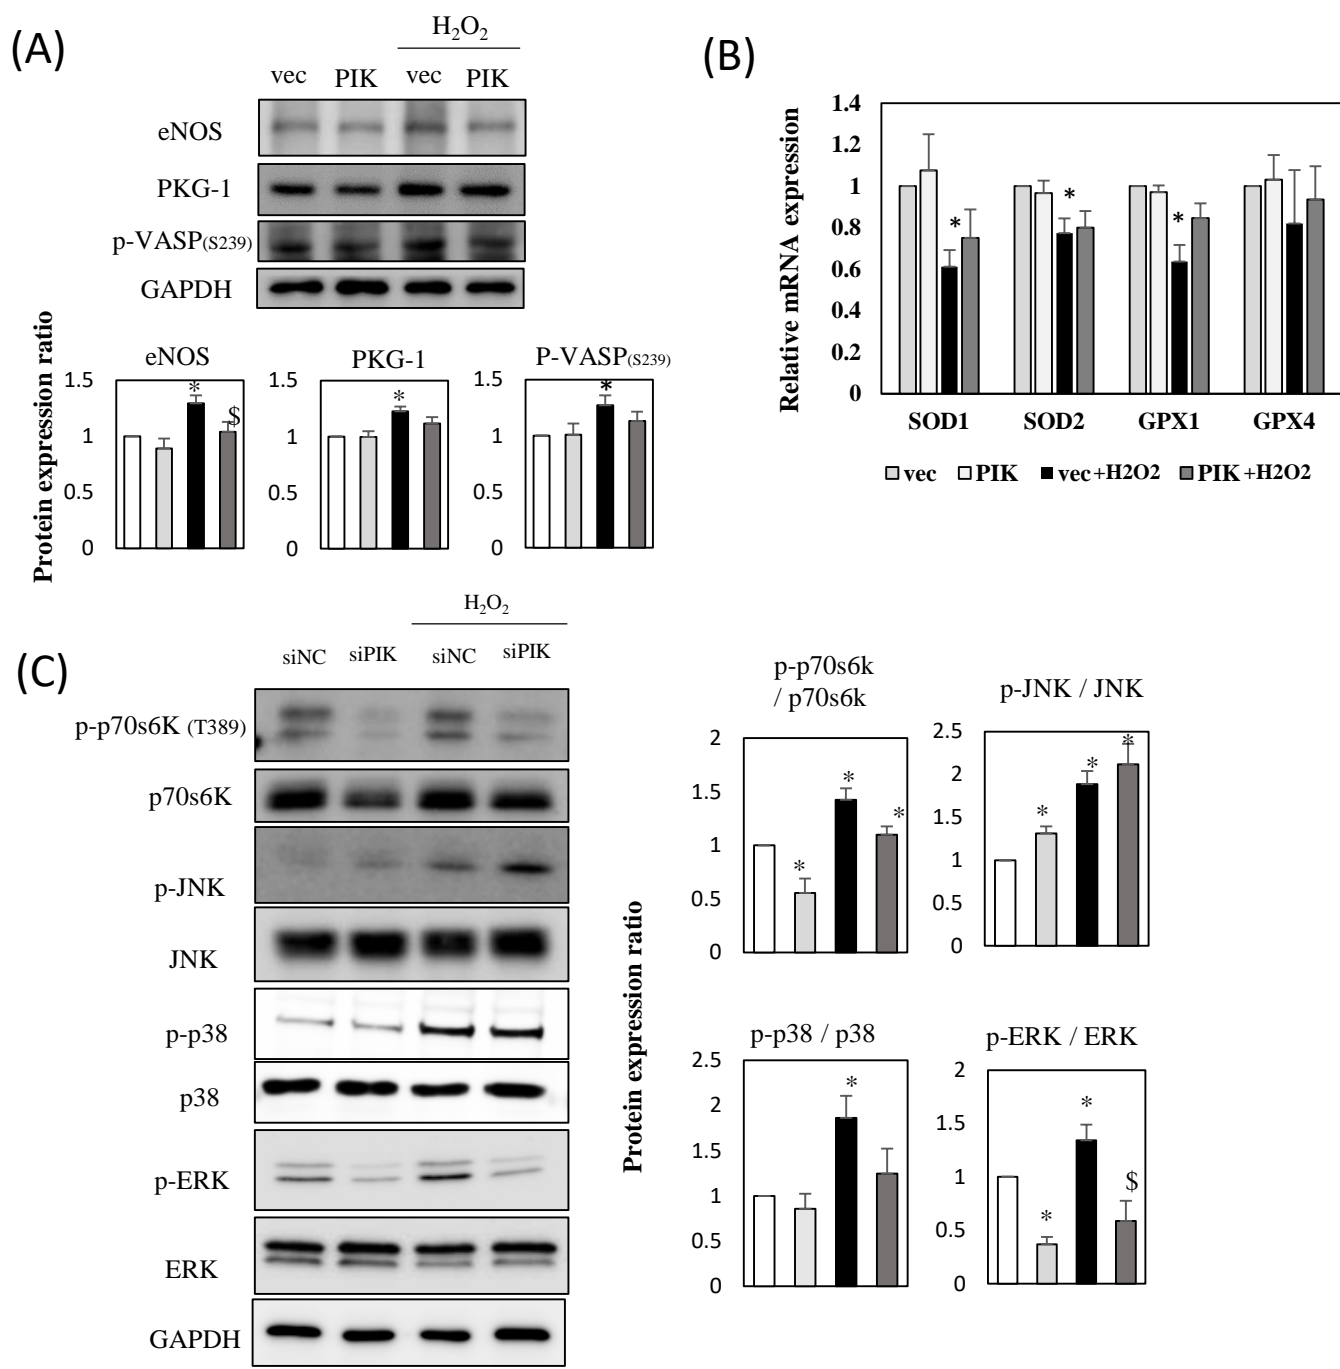

**Supplementary Figure S2. Regulation of PIK3IP1 is related with eNOS-PKG-p-VASP signaling, antioxidant enzyme expression and MAPK signaling.** (A) H9c2 cardiomyocytes were transfected with pcDNA3.1 (Vec) or pcDNA3.1-PIK3IP1 (PIK) for 24h, and subsequently treated with or without H<sub>2</sub>O<sub>2</sub> (200  $\mu$ M). Expression levels of eNOS, PKG-1 and p-VASP were measured by western blotting and normalized to GAPDH. (B) Relative mRNA expressions of SOD1, SOD2, GPX1, and GPX4 were measured by qRT-PCR. The expression levels of the mRNAs were normalized to 18S rRNA. (C) H9c2 cells were transfected with siPIK (si-PIK3IP1) or siNC (negative control) for 24 h (25 nM each), and subsequently treated with or without H<sub>2</sub>O<sub>2</sub> (200  $\mu$ M). The protein levels of p-p70s6K, p-JNK, p-p38 and p-ERK were measured by western blotting. Each expression of phosphorylated form was normalized by the expression of p70s6K, JNK, p38 and p-ERK. The results for data displayed in bar charts are presented as means  $\pm$  SEM; n=3; Statistical significance is shown as \*P <0.05 relative to Vec or siNC group. \$P <0.05 relative to siNC treated with H<sub>2</sub>O<sub>2</sub>.

# Supplementary Figure S3

## Uncropped gel images for **Figure 1C**

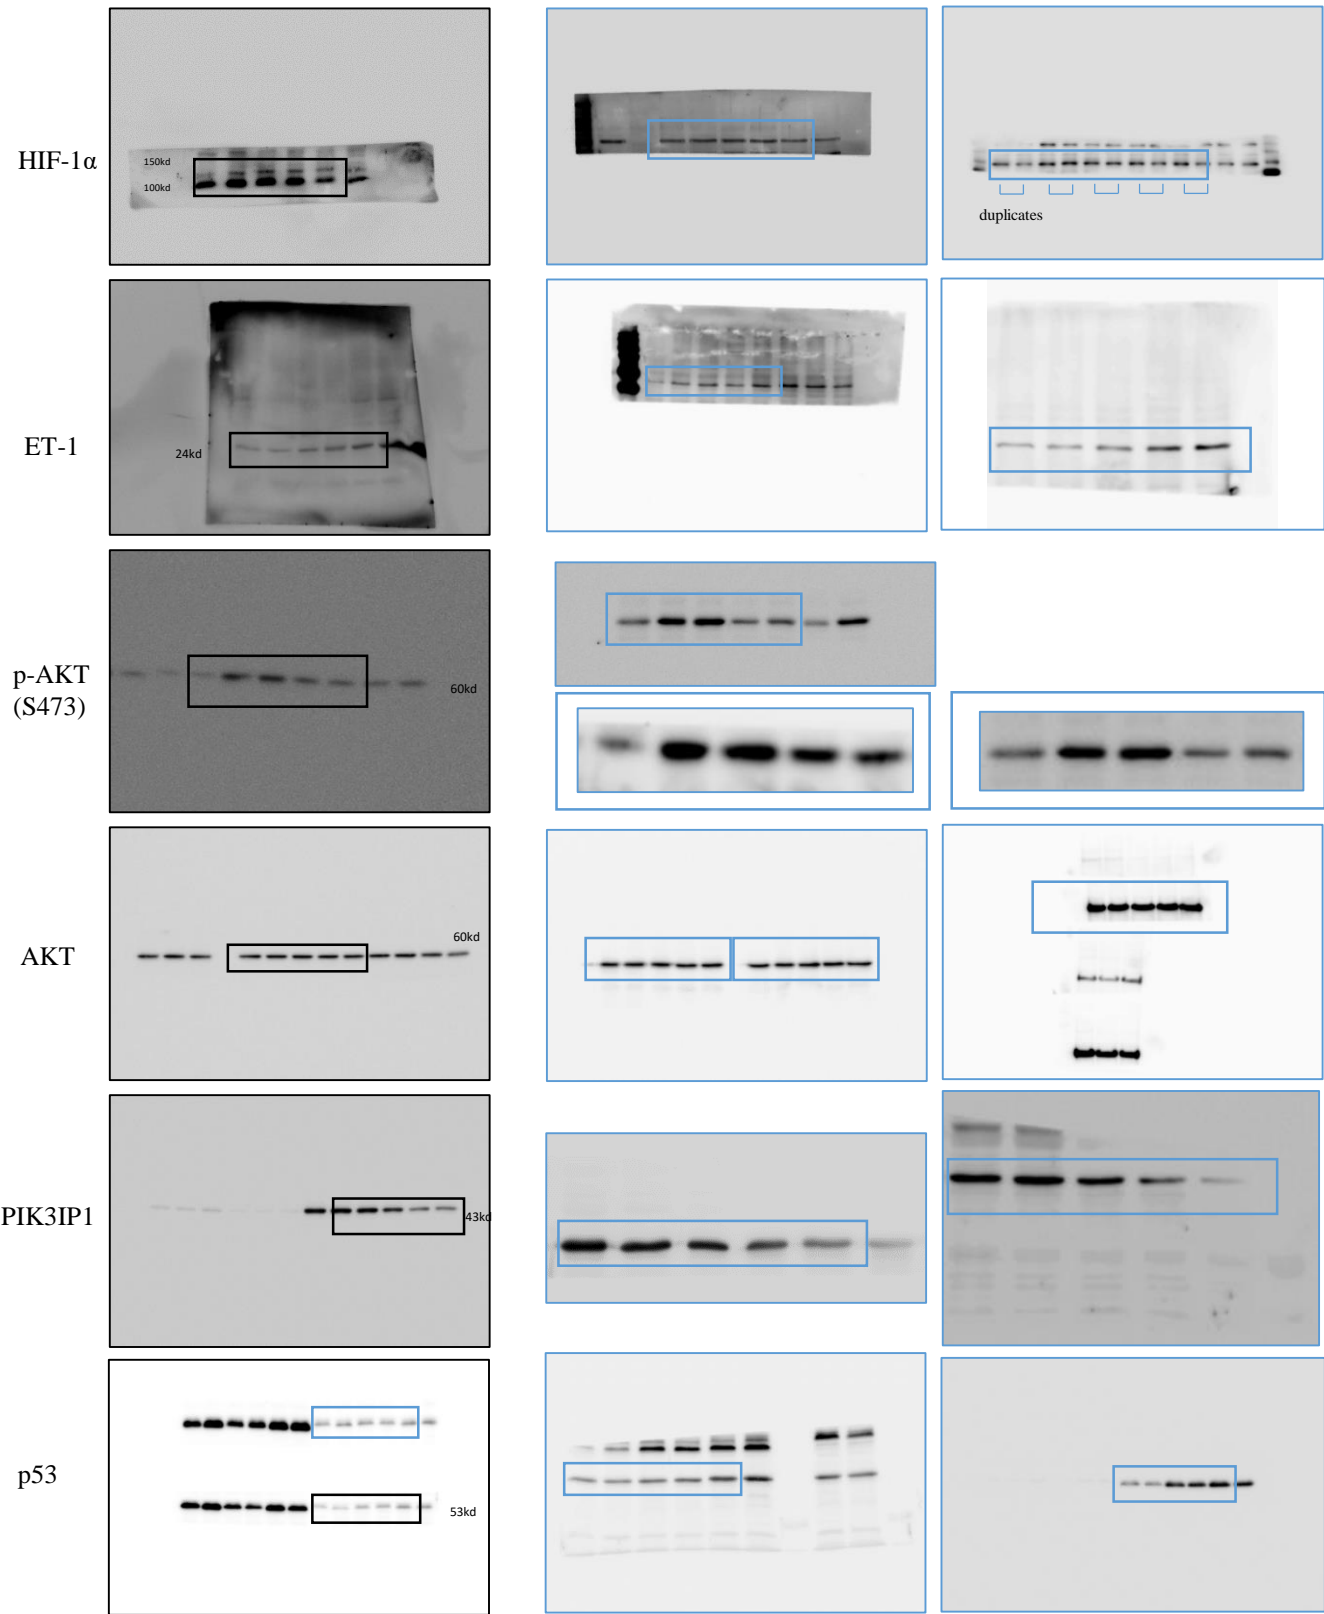

**Supplementary Figure S3.** Blots are for Figure 1C. Blots marked with black boxes are on the main figures and blots marked with blue boxes are replicates.

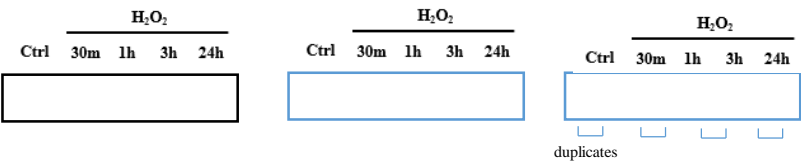

# Supplementary Figure S4

## Uncropped gel images for **Figure 1C**

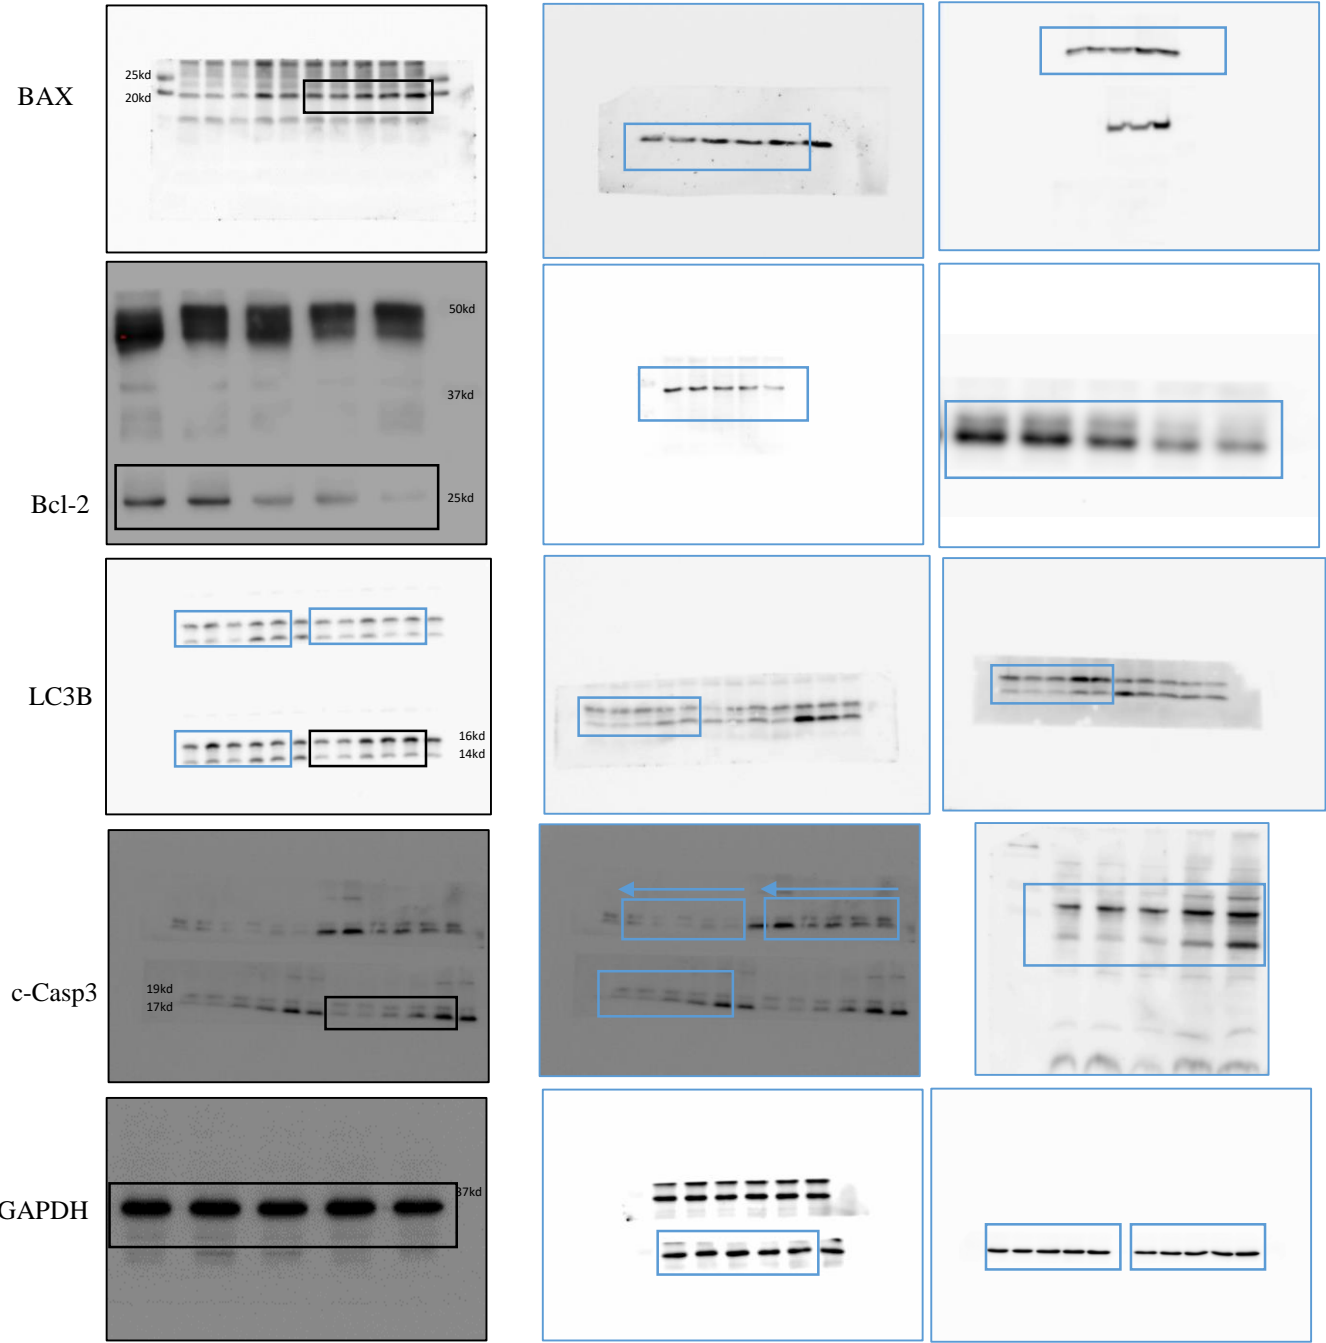

**Supplementary Figure S4.** Blots are for Figure 1C. Blots marked with black boxes are on the main figures and blots marked with blue boxes are replicates.

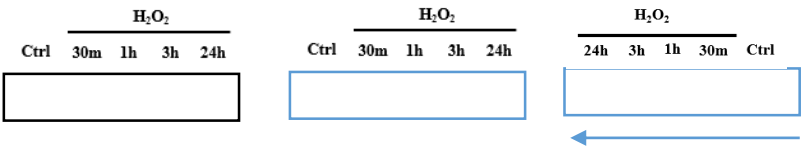

# Supplementary Figure S5

## Uncropped gel images for **Figure 2A**

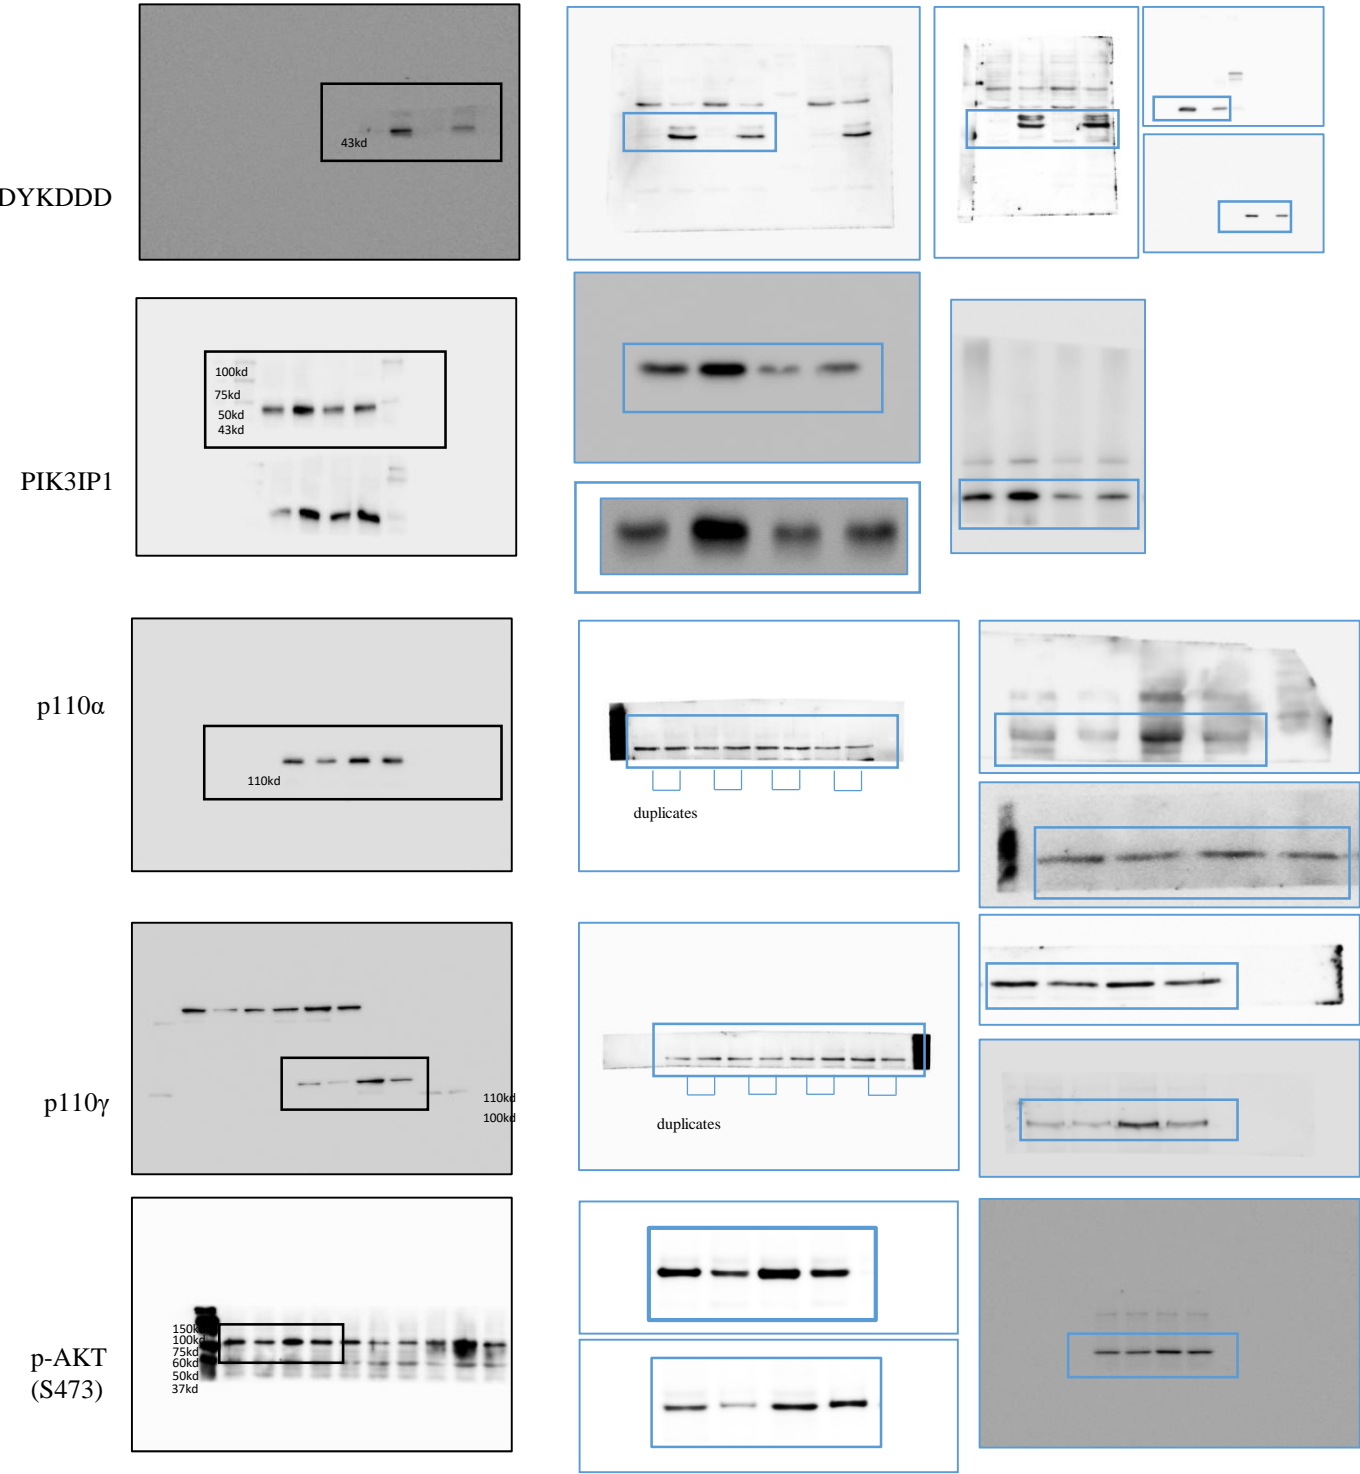

**Supplementary Figure S5.** Blots are for Figure 2A. Blots marked with black boxes are on the main figures and blots marked with blue boxes are replicates.

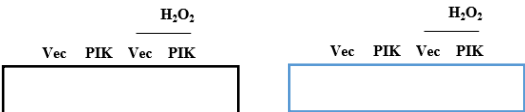

Uncropped gel images for **Figure 2A**

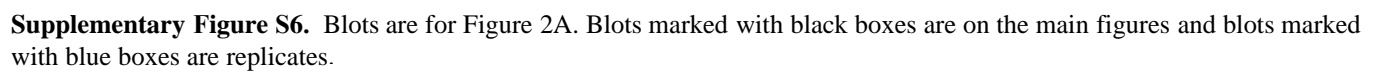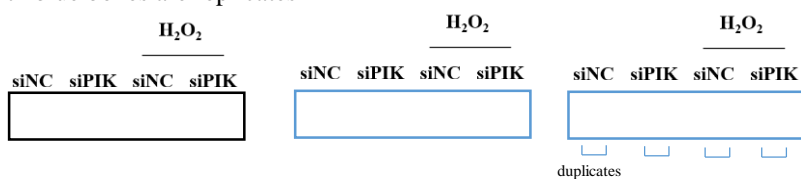



# Supplementary Figure S7

## Uncropped gel images for Figure 3A

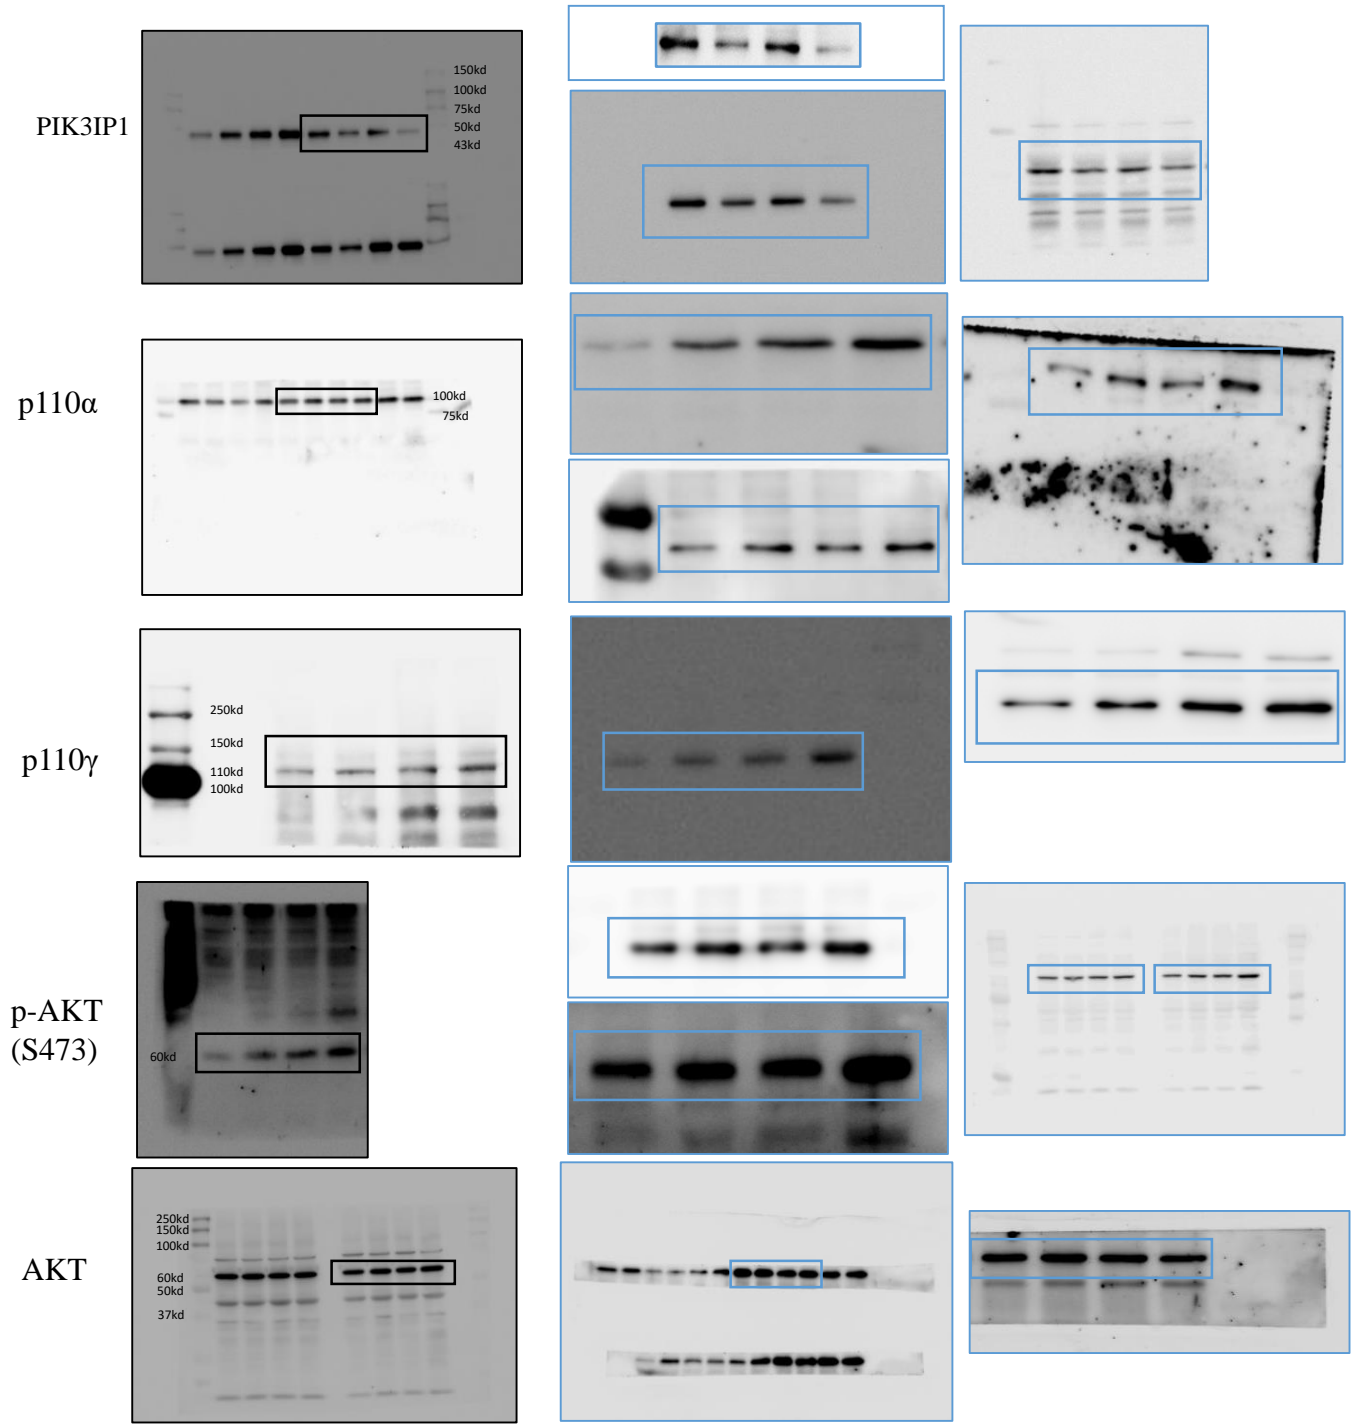

**Supplementary Figure S7.** Blots are for Figure 3A. Blots marked with black boxes are on the main figures and blots marked with blue boxes are replicates.

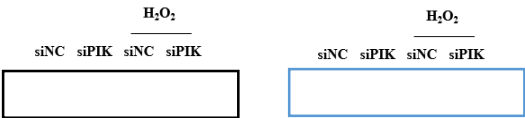



# Supplementary Figure S8

## Uncropped gel images for **Figure 3A**

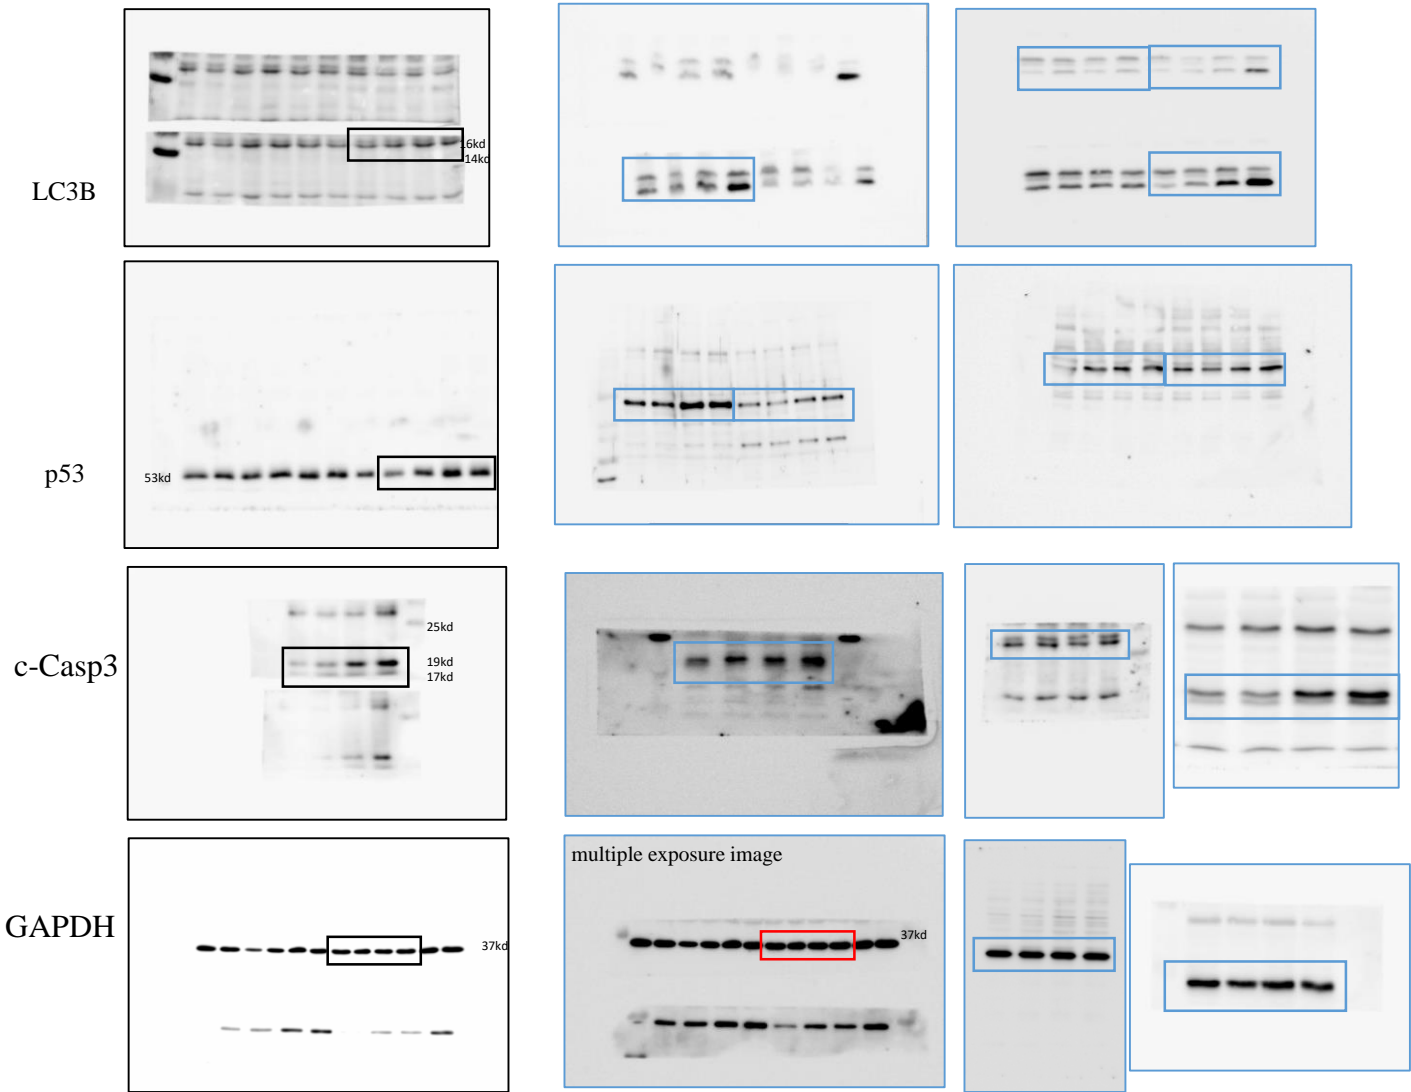

**Supplementary Figure S8.** Blots are for Figure 3A. Blots marked with black boxes are on the main figures and blots marked with blue boxes are replicates. GAPDH blots were overexposed. Blots marked with red boxes are multiple exposure images for GAPDH.

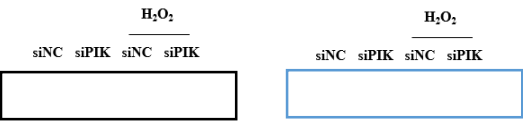

# Supplementary Figure S9

## Uncropped gel images for **Figure 4**

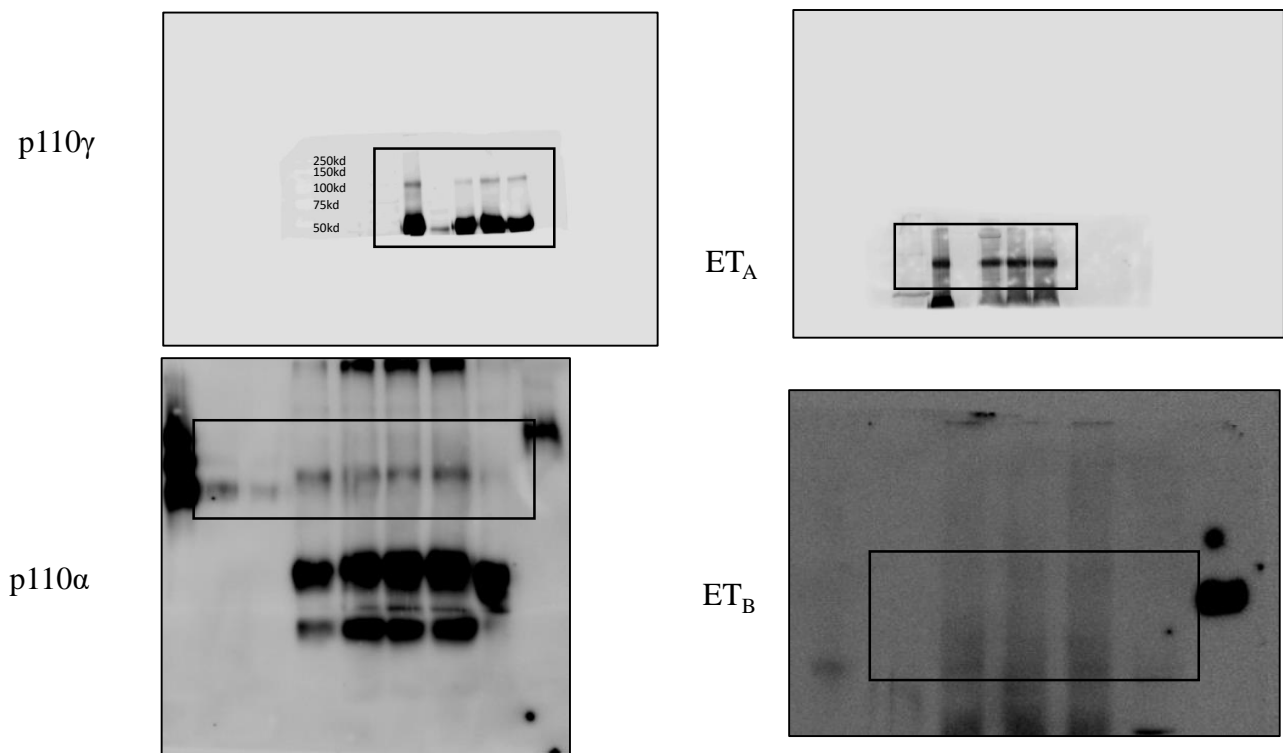

**Supplementary Figure S9.** Blots are for Figure 4. Blots marked with black boxes are on the main figures and blots marked with blue boxes are replicates.

| Lysate        | IP: anti-PIK3IP1 |                 |                 |                 | IP: anti-PIK3IP1 |    |                 |                 |                                 |
|---------------|------------------|-----------------|-----------------|-----------------|------------------|----|-----------------|-----------------|---------------------------------|
|               | nc               | 1 <sup>st</sup> | 2 <sup>nd</sup> | 3 <sup>rd</sup> | Lysate           | nc | 1 <sup>st</sup> | 2 <sup>nd</sup> | 3 <sup>rd</sup> 4 <sup>th</sup> |
| p110 $\gamma$ | ET <sub>A</sub>  | ET <sub>B</sub> |                 |                 | p110 $\alpha$    |    |                 |                 |                                 |

# Supplementary Figure S10

## Uncropped gel images for **Figure 5B**

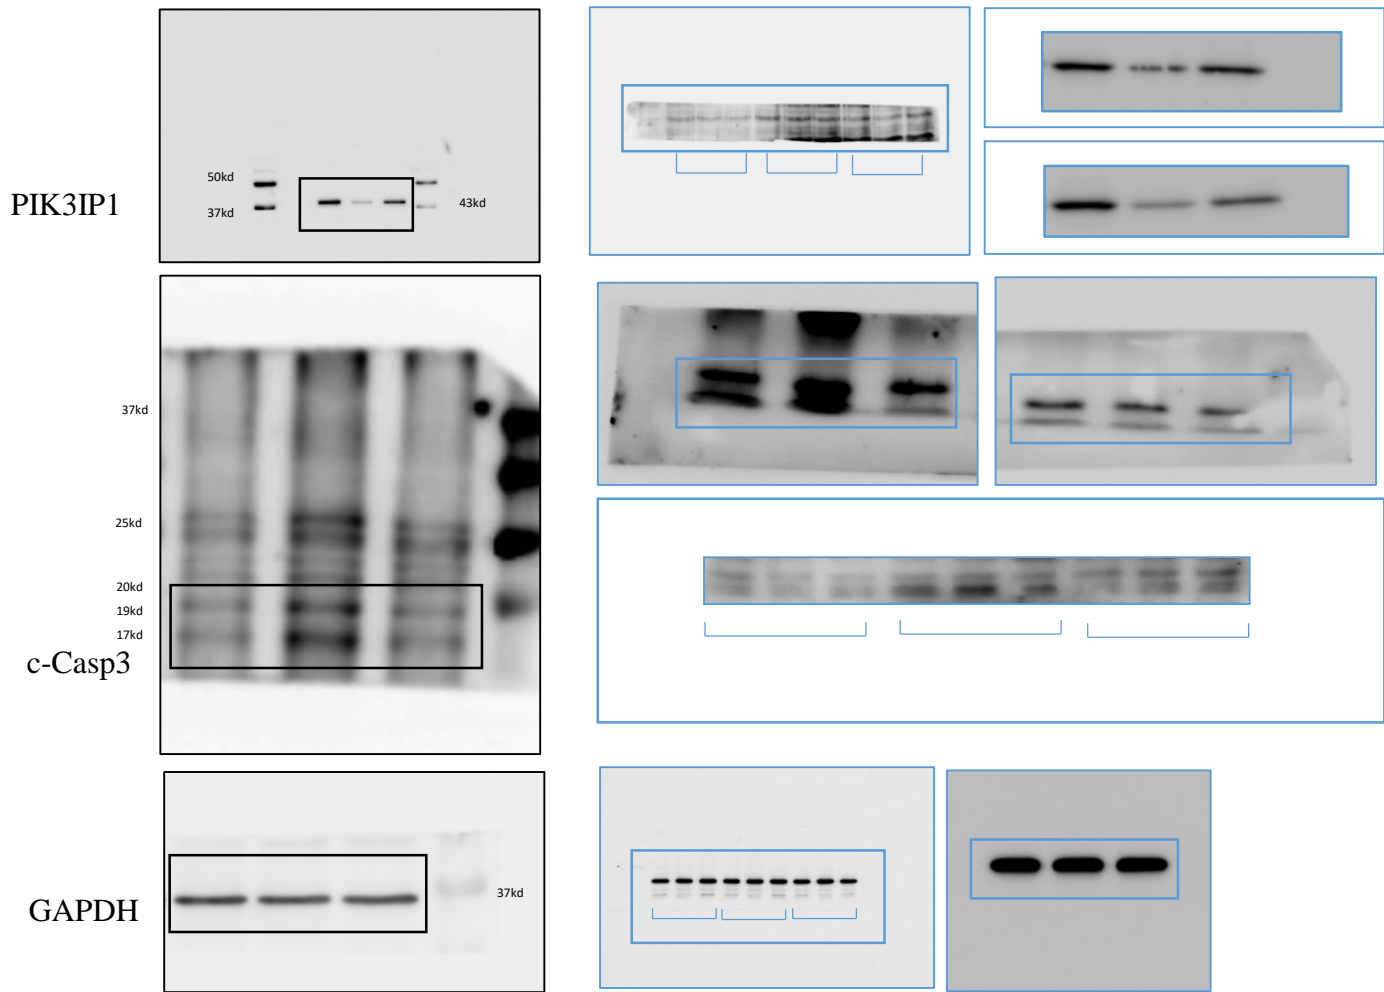

**Supplementary Figure S10.** Blots are for Figure 5B. Blots marked with black boxes are on the main figures and blots marked with blue boxes are replicates.

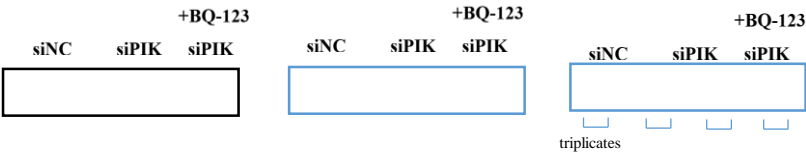

# Supplementary Figure S11

## Uncropped gel images for **Figure 6A**

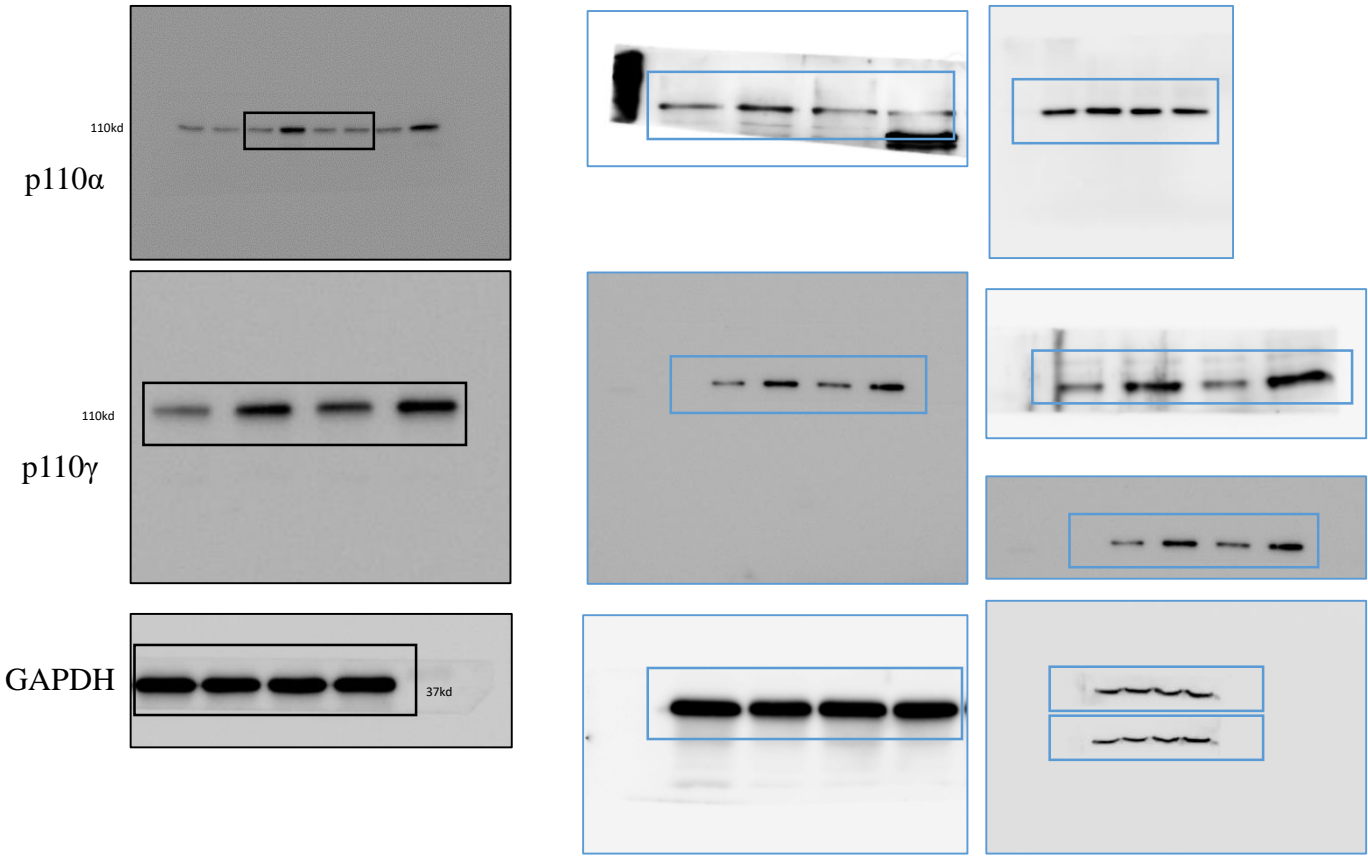

**Supplementary Figure S11.** Blots are for Figure 6A. Blots marked with black boxes are on the main figures and blots marked with blue boxes are replicates.

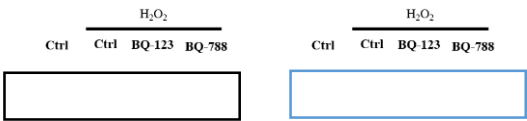

# Supplementary Figure S12

## Uncropped gel images for Figure 6B

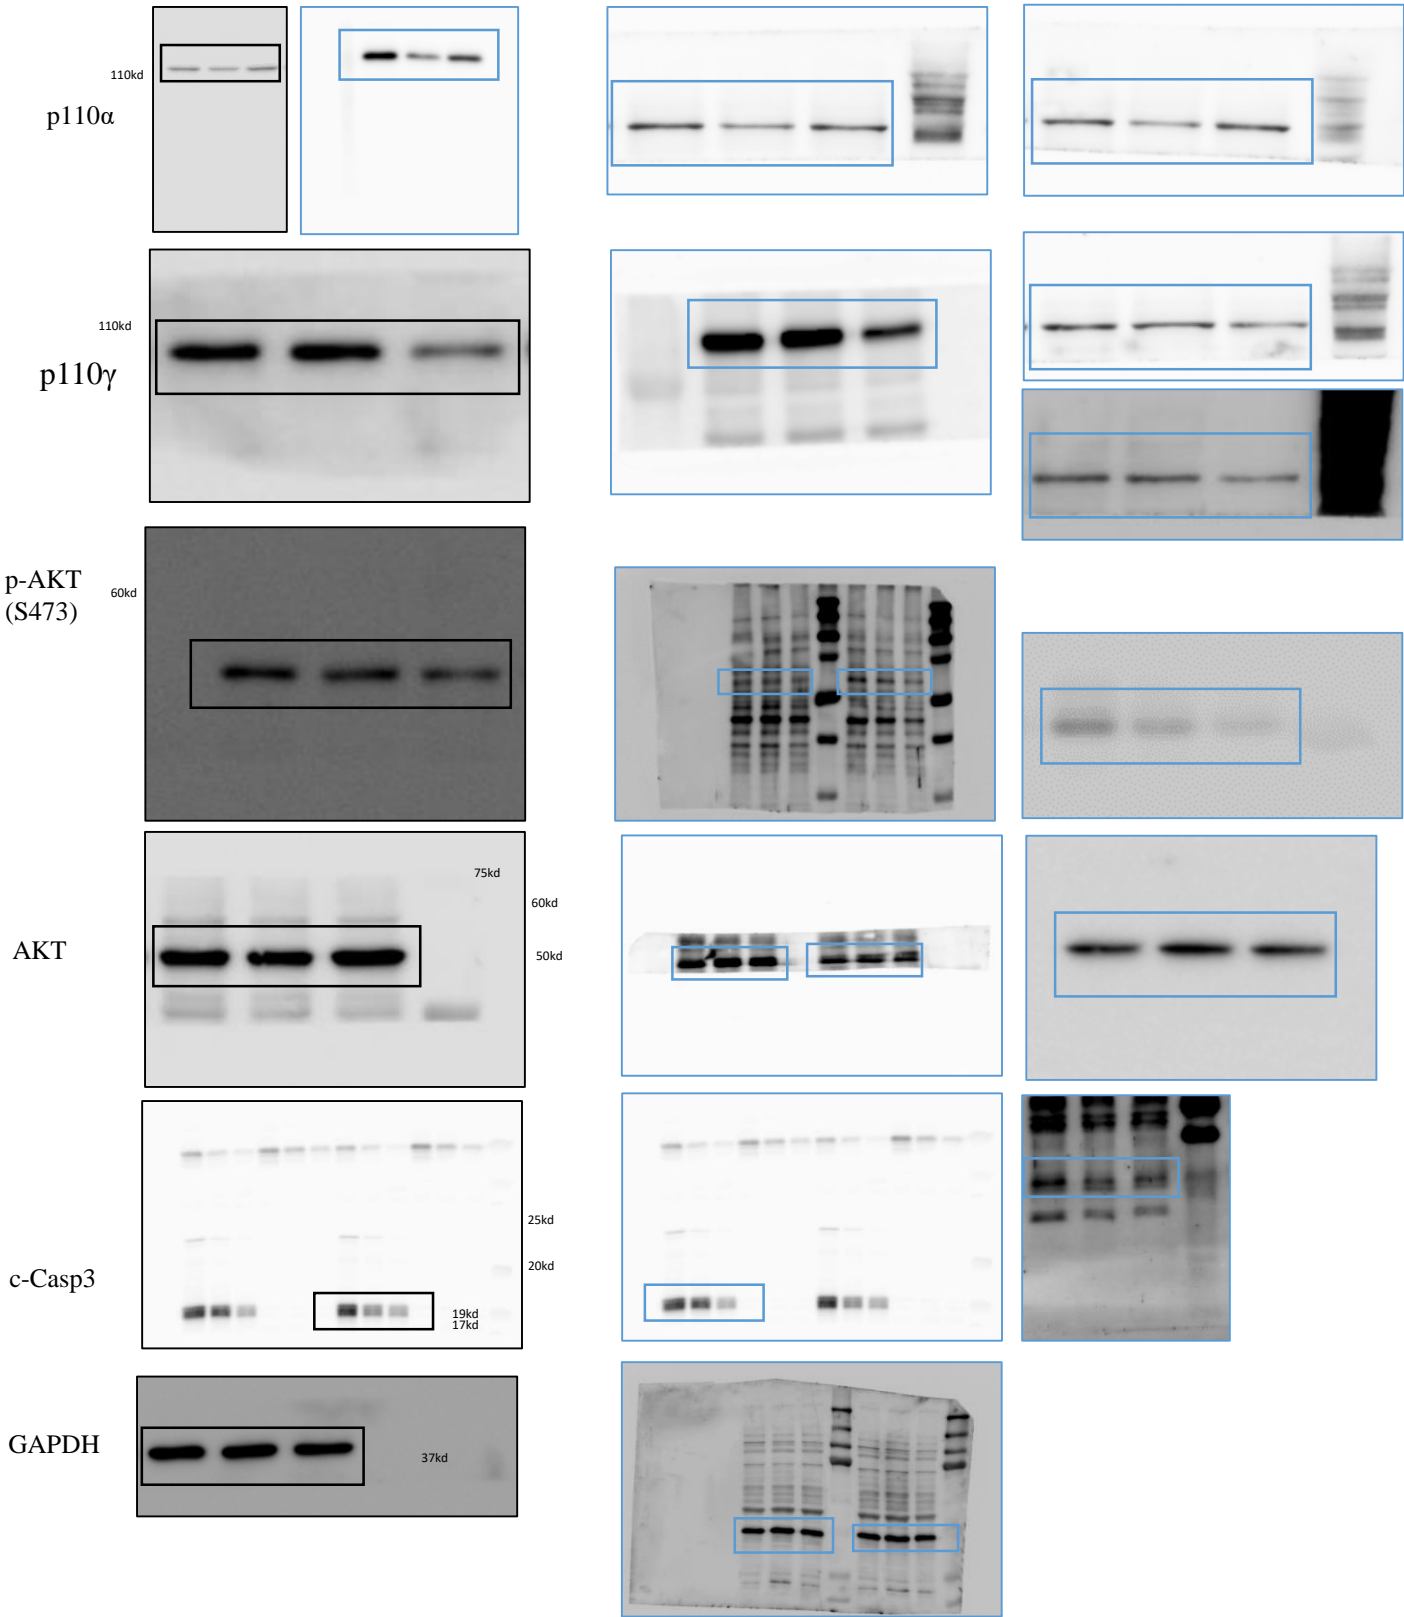

**Supplementary Figure S12.** Blots are for Figure 6B. Blots marked with black boxes are on the main figures and blots marked with blue boxes are replicates.

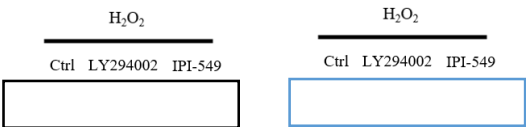

# Supplementary Figure S13

## Uncropped gel images for Supplementary Figure S1C

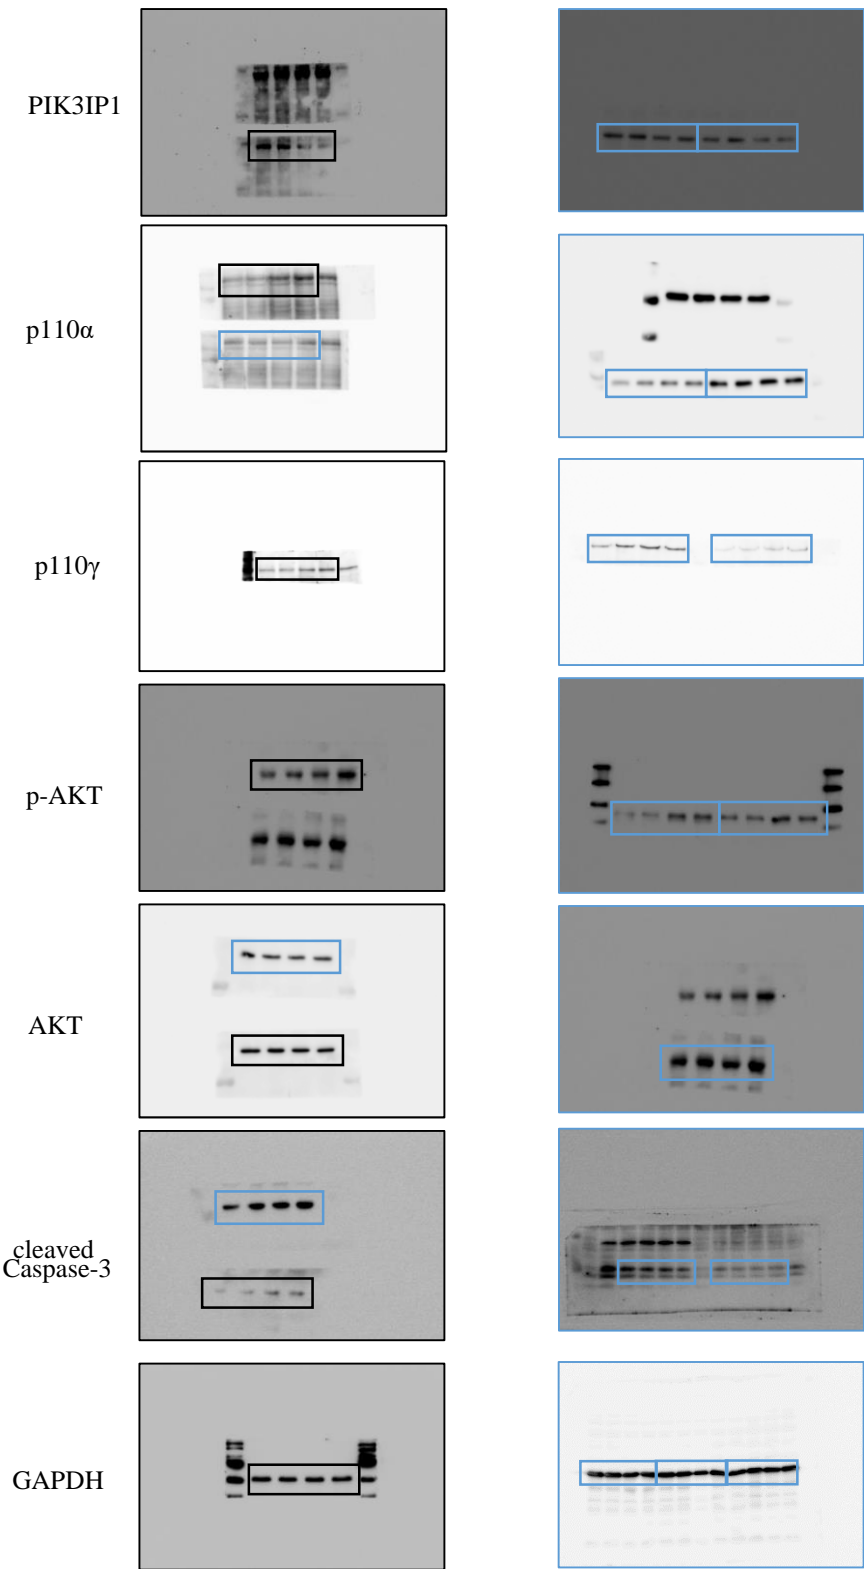

**Supplementary Figure S13.** Blots are for Supplementary figure 1C. Blots marked with black boxes are on the main figures and blots marked with blue boxes are replicates.

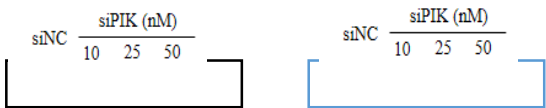

# Supplementary Figure S14

## Uncropped gel images for Supplementary Figure S1F

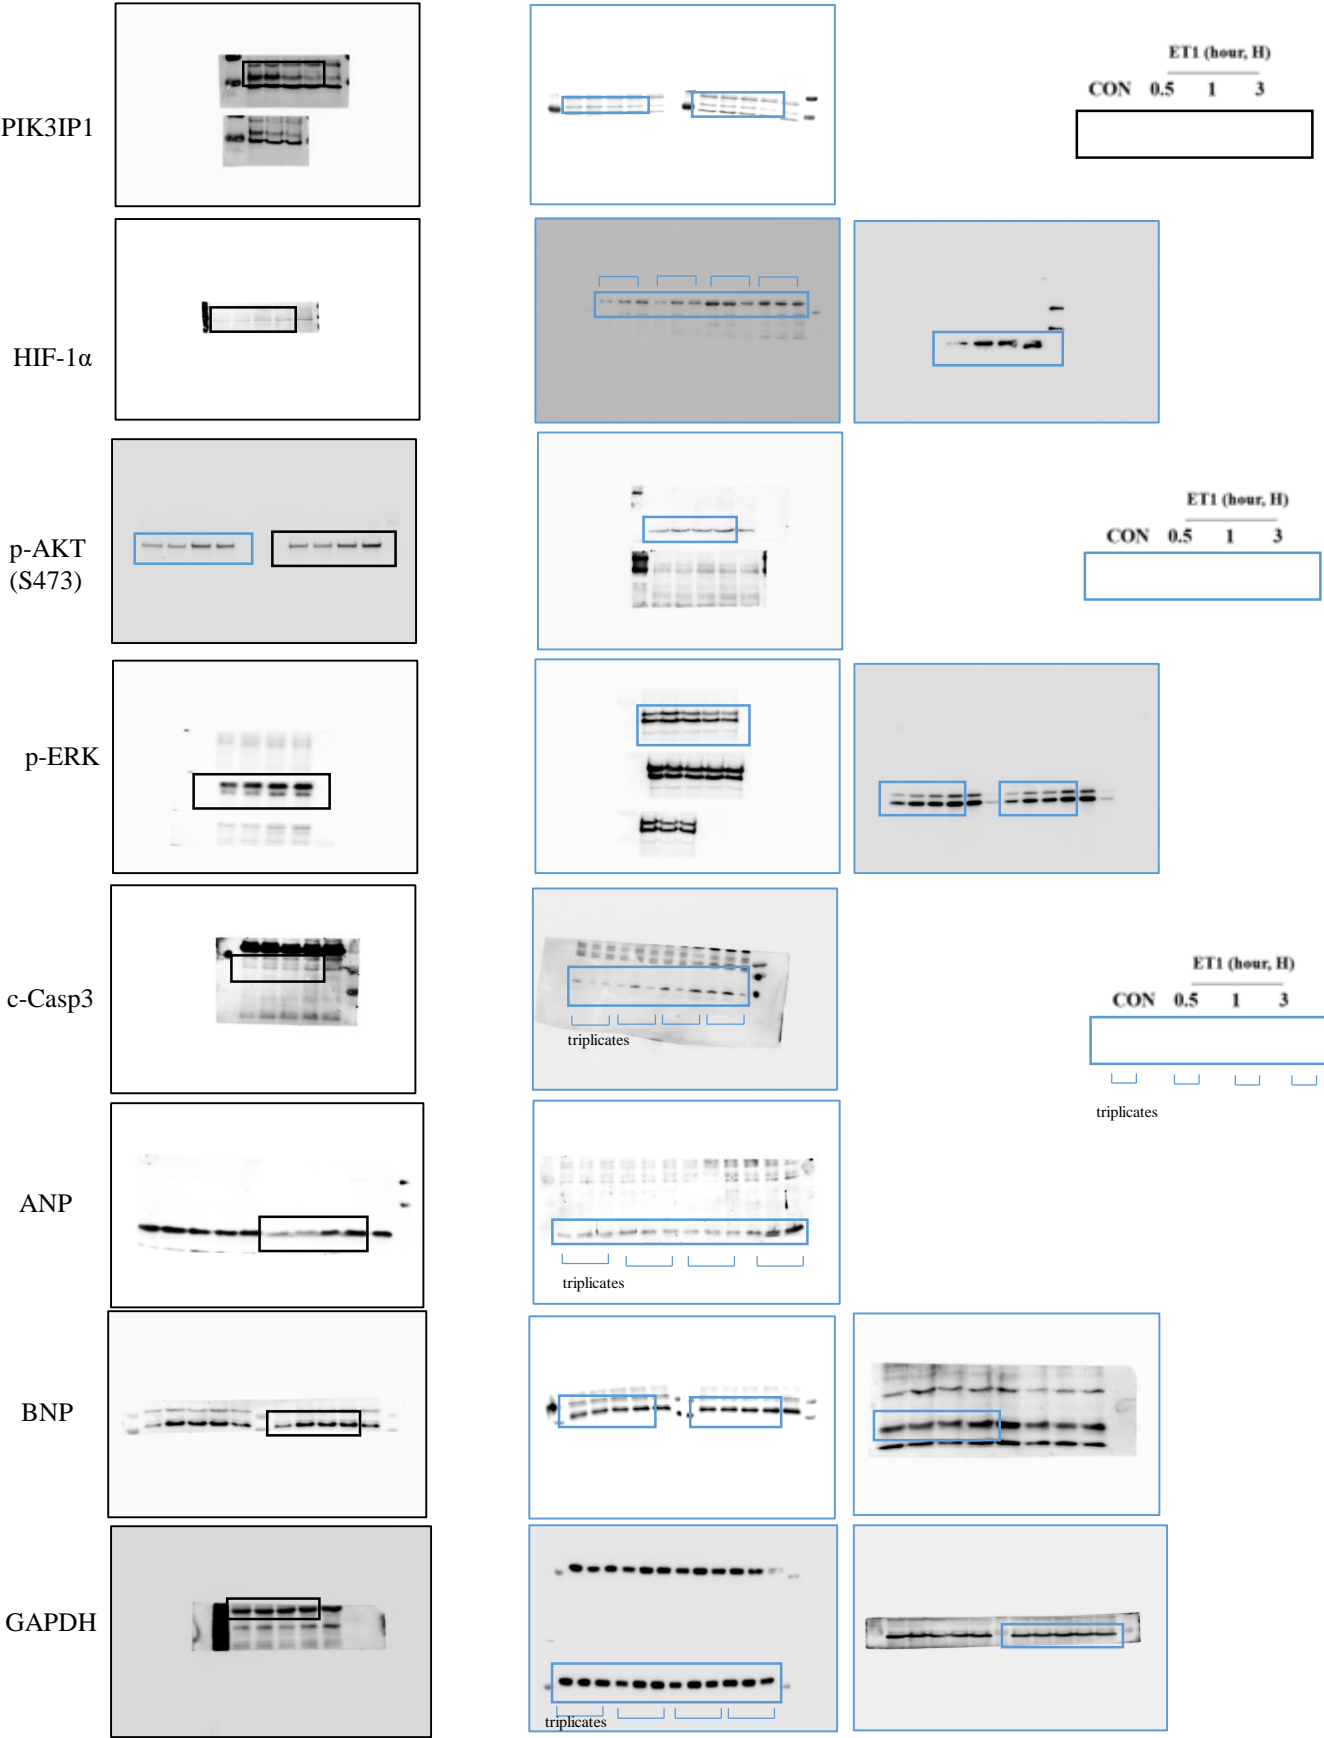

**Supplementary Figure 14.** Blots are for Supplementary figure 1F. Blots marked with black boxes are on the figures and blots marked with blue boxes are replicates.



# Supplementary Figure S15

## Uncropped gel images for Supplementary Figure S2A

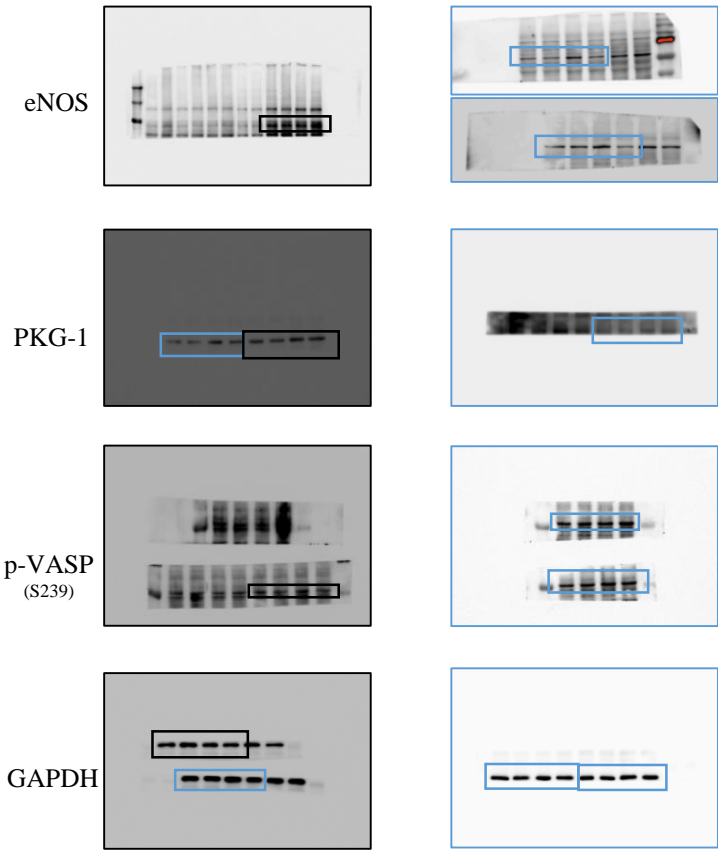

**Supplementary Figure S15.** Blots are for Supplementary figure 2A. Blots marked with black boxes are on the figures and blots marked with blue boxes are replicates.

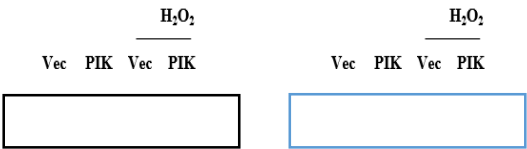

# Supplementary Figure S16

## Uncropped gel images for Supplementary Figure S2C

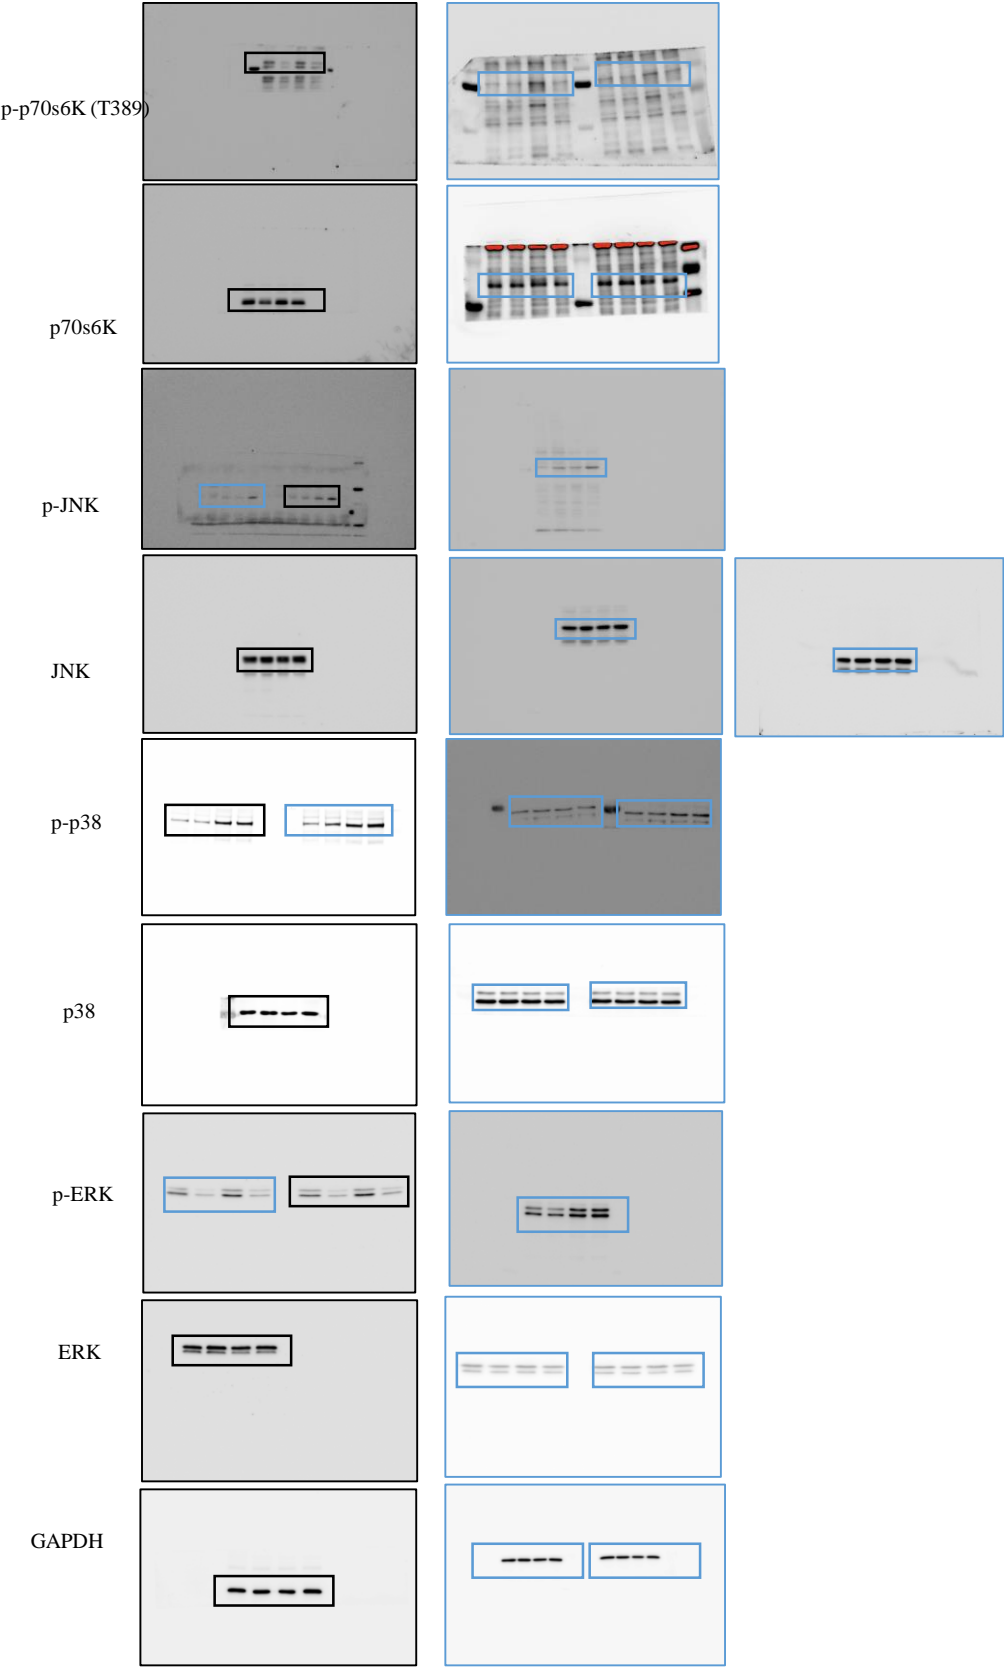

**Supplementary S16.** Blots are for Supplementary figure 2C. Blots marked with black boxes are on the figures and blots marked with blue boxes are replicates.

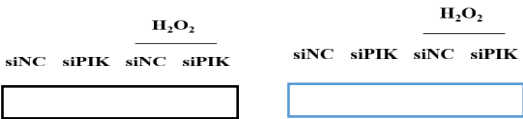

Supplement: s1 [file s1]
